# Supplementary material
Source: PubMed Central journal article supplement (PMC6026065)

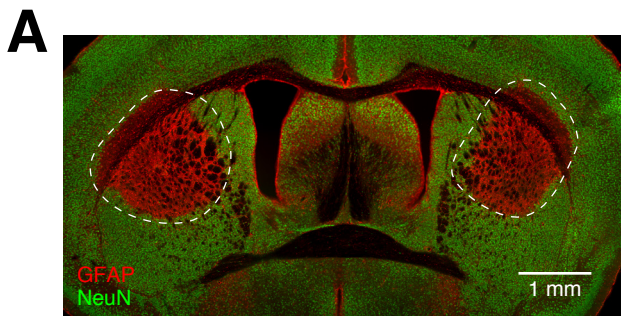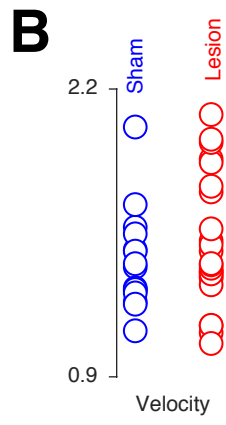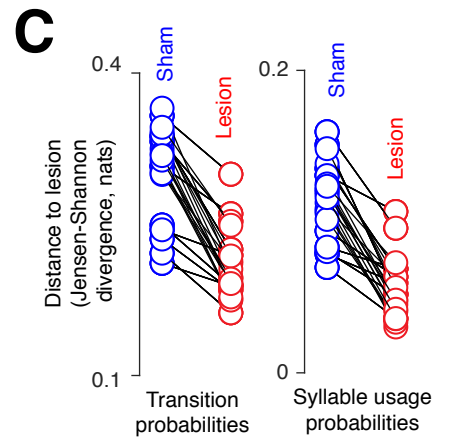

Supplement: NIHMS967127-supplement-10.pdf [file NIHMS967127-supplement-10.pdf]

**A**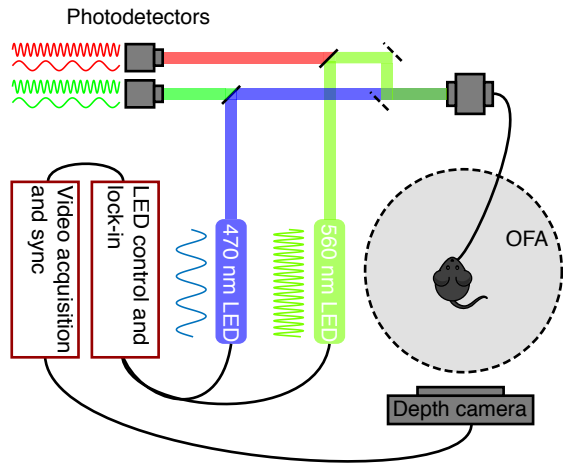**B**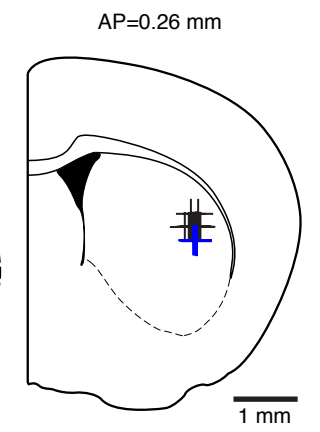

Photometry fiber placement  
 GCaMP6s + jRCaMP1b  
 injection site

**C**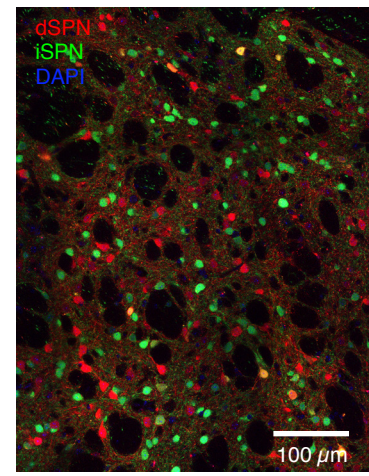**D**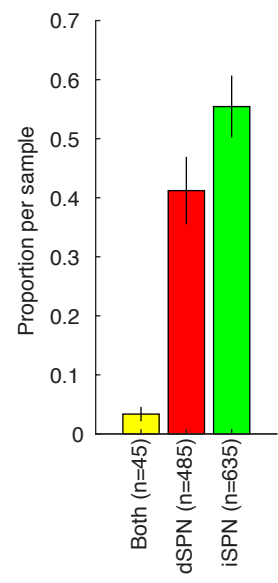**E**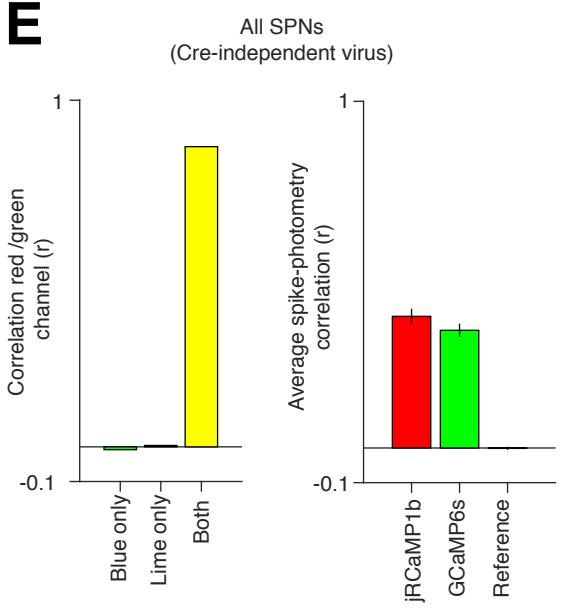**F**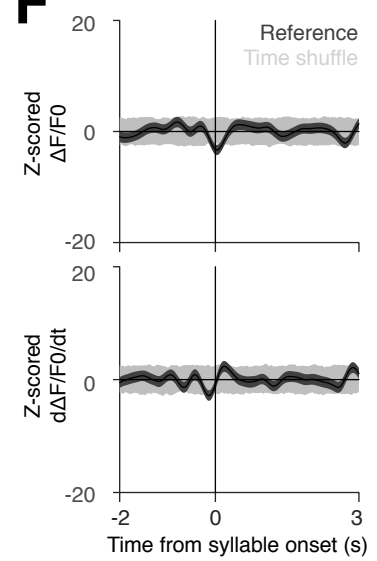**G**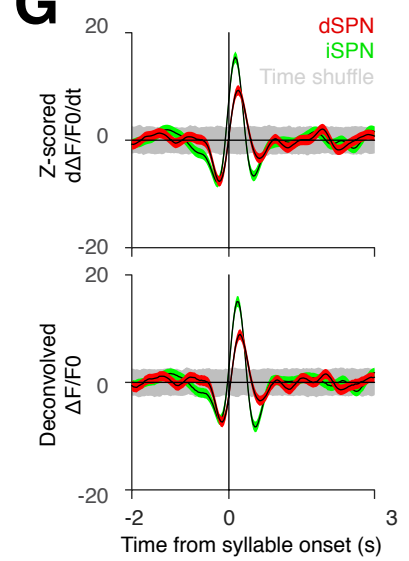

Supplement: NIHMS967127-supplement-4.pdf [file NIHMS967127-supplement-4.pdf]

**A**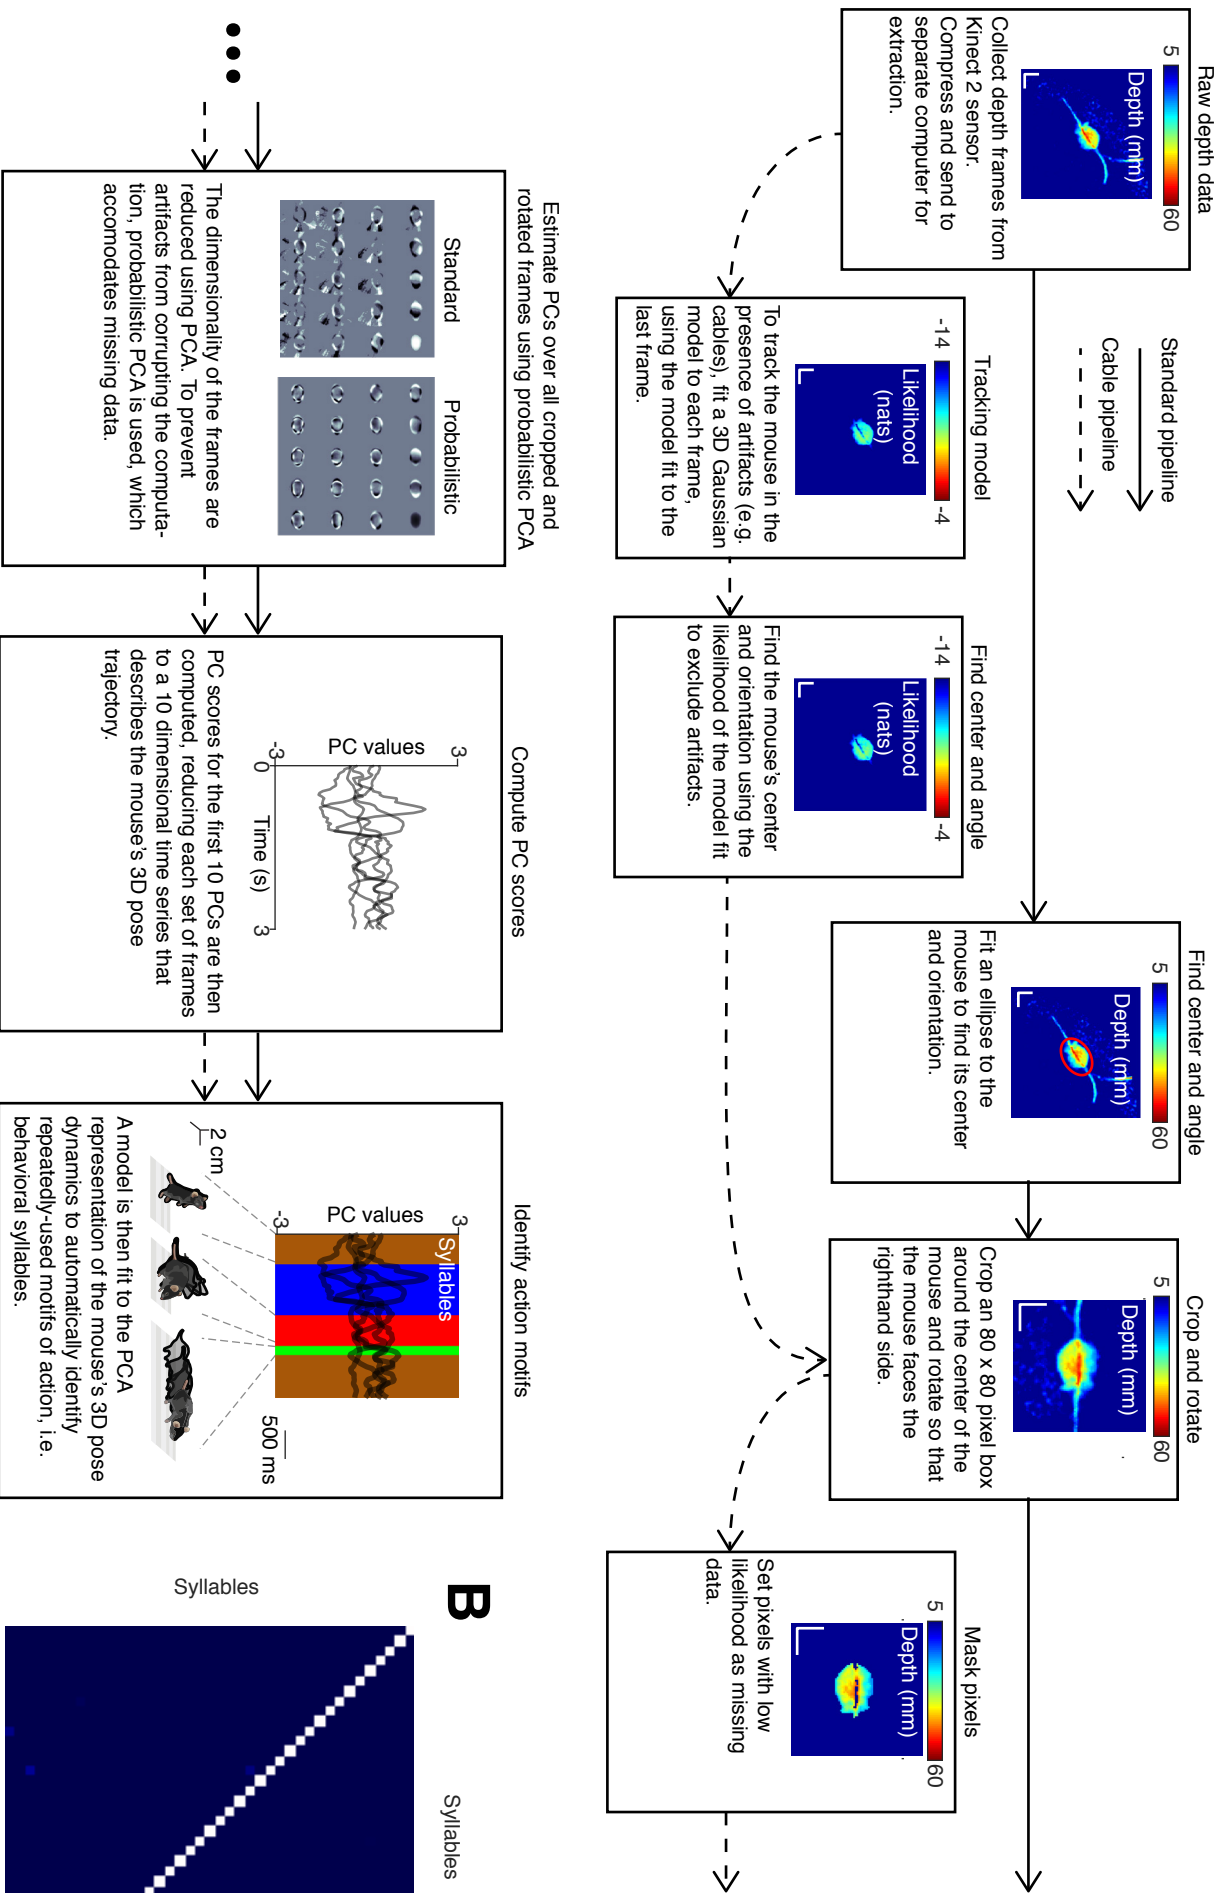**B**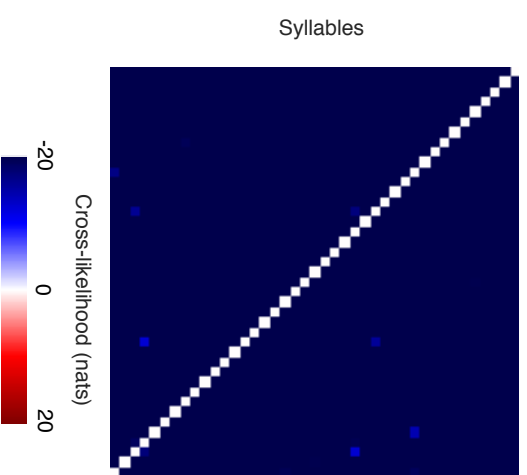

Supplement: NIHMS967127-supplement-5.pdf [file NIHMS967127-supplement-5.pdf]

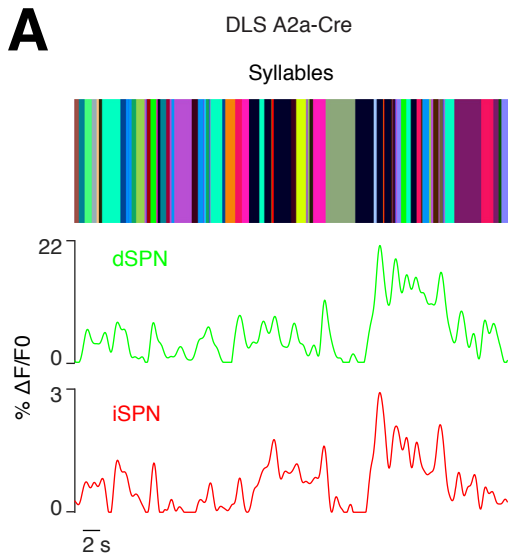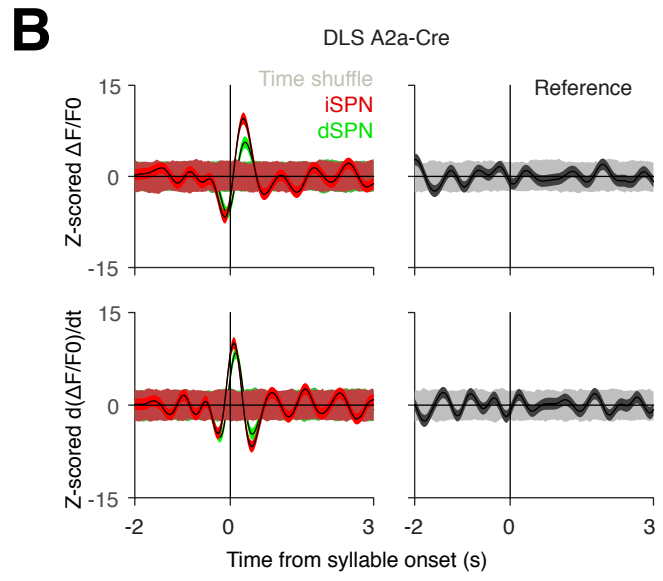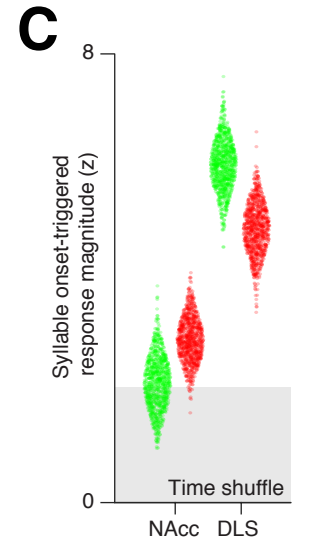

Supplement: NIHMS967127-supplement-6.pdf [file NIHMS967127-supplement-6.pdf]

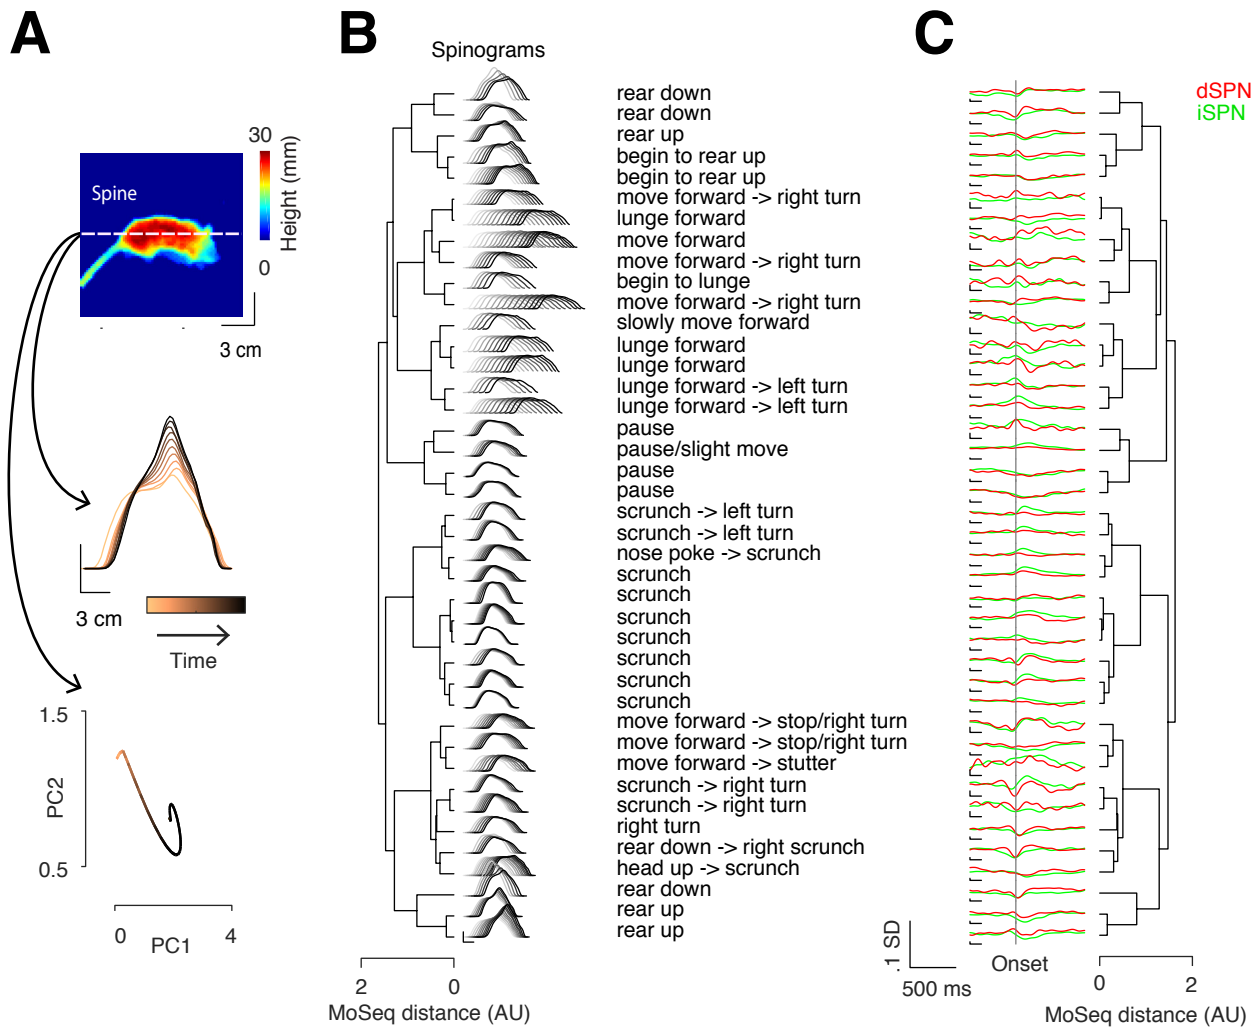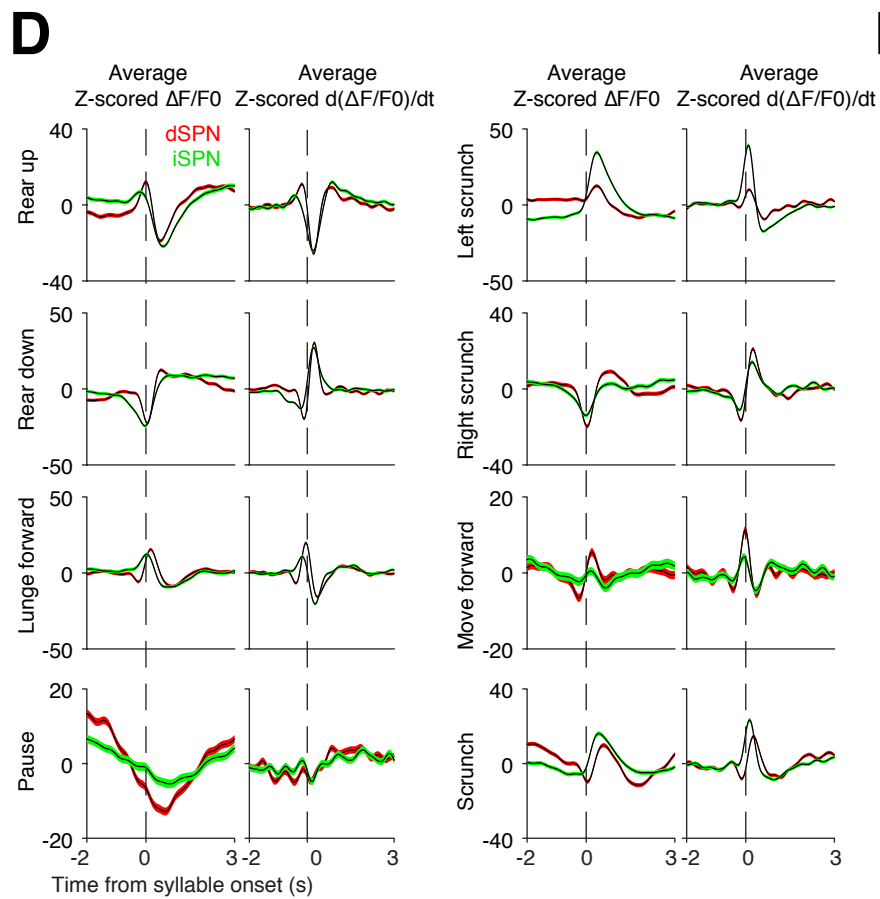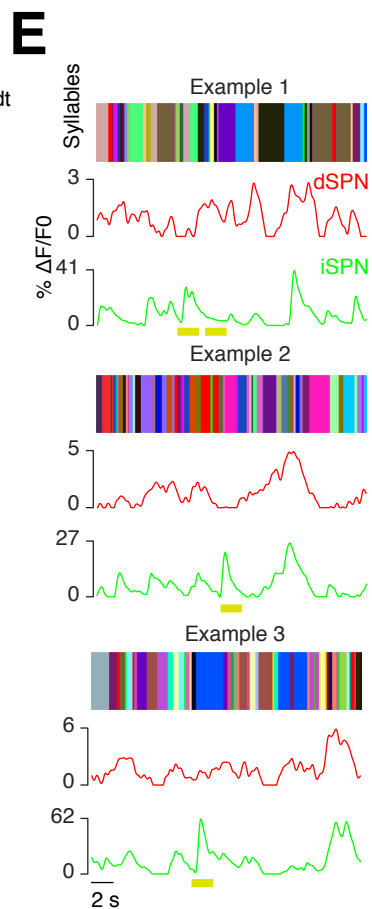

Supplement: NIHMS967127-supplement-7.pdf [file NIHMS967127-supplement-7.pdf]

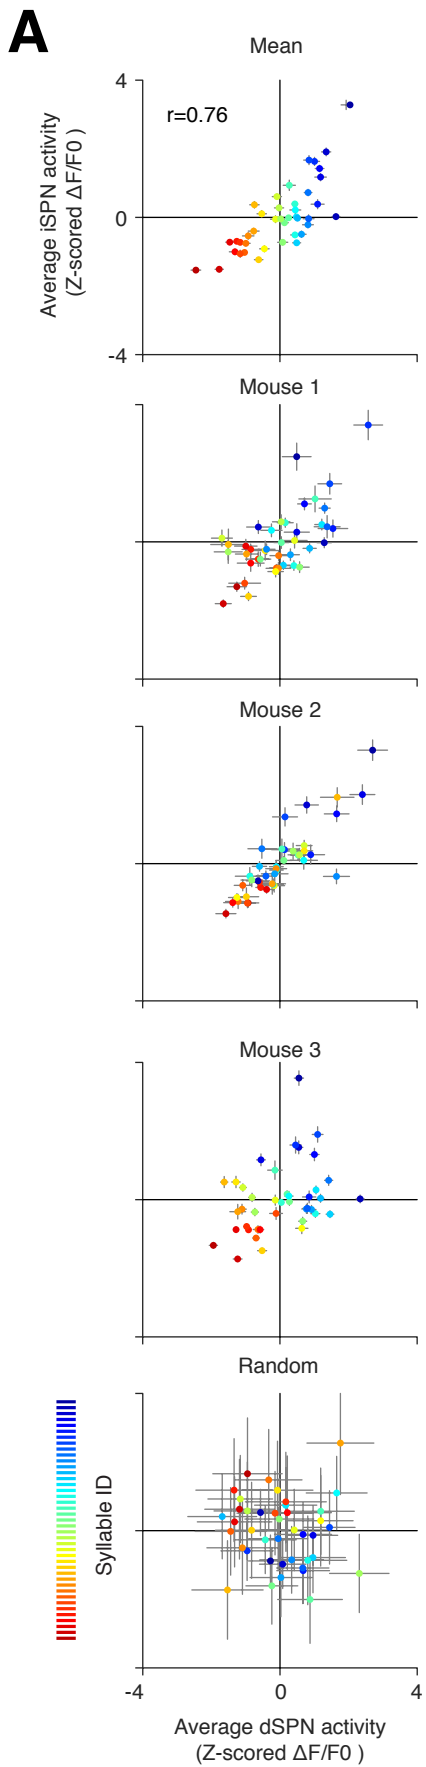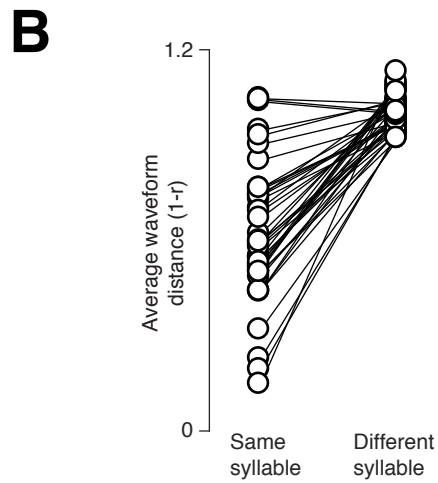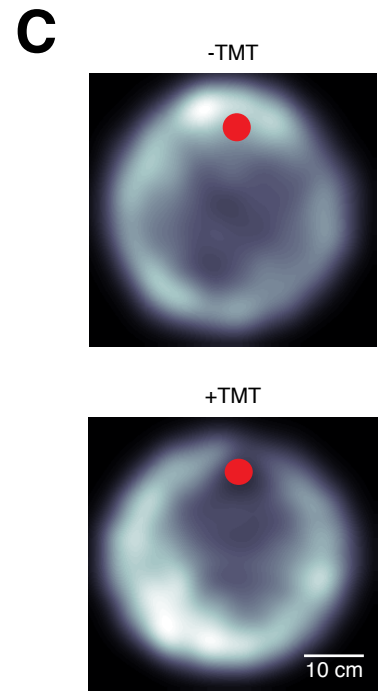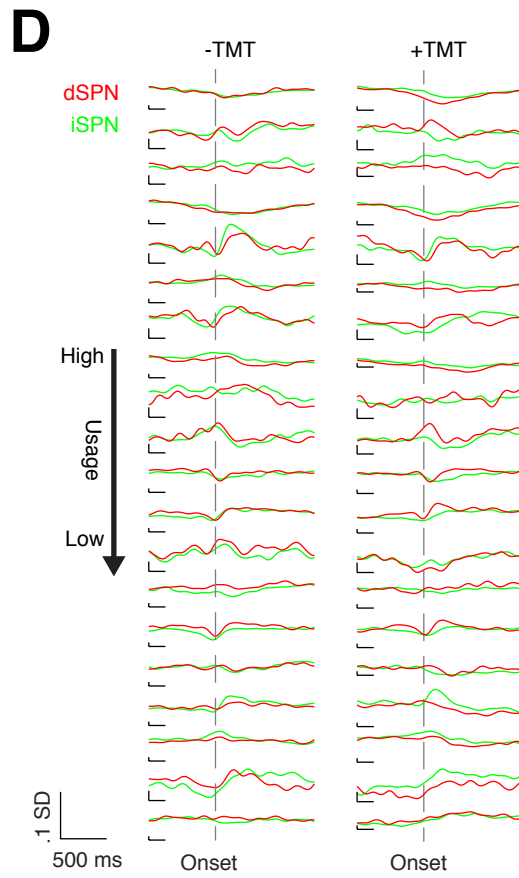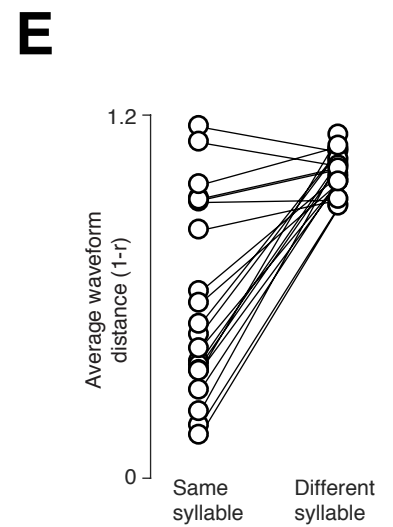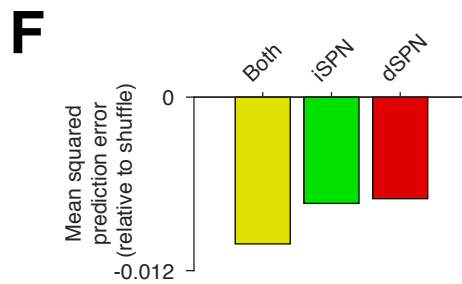

Supplement: NIHMS967127-supplement-8.pdf [file NIHMS967127-supplement-8.pdf]

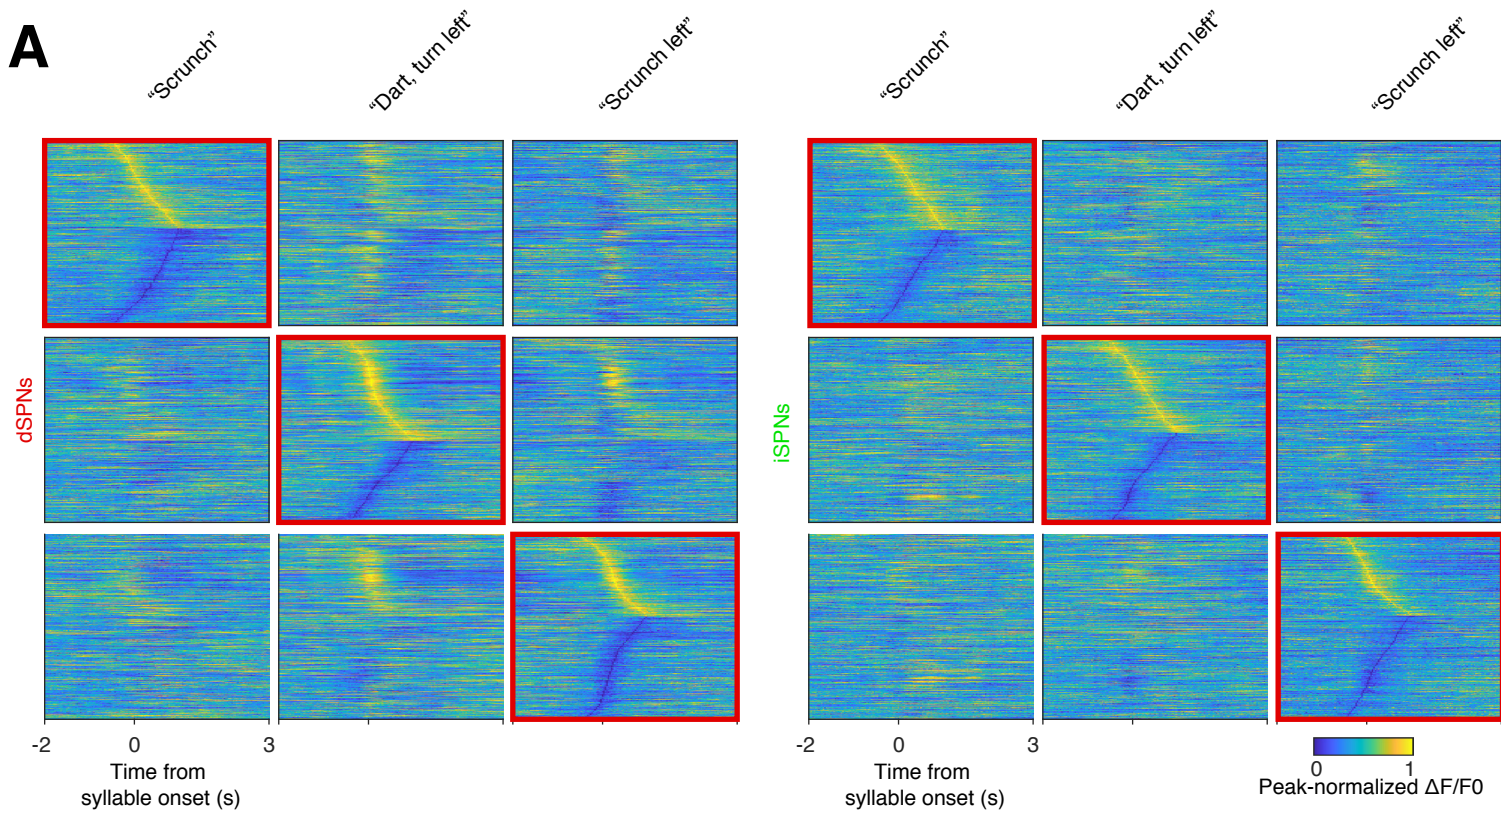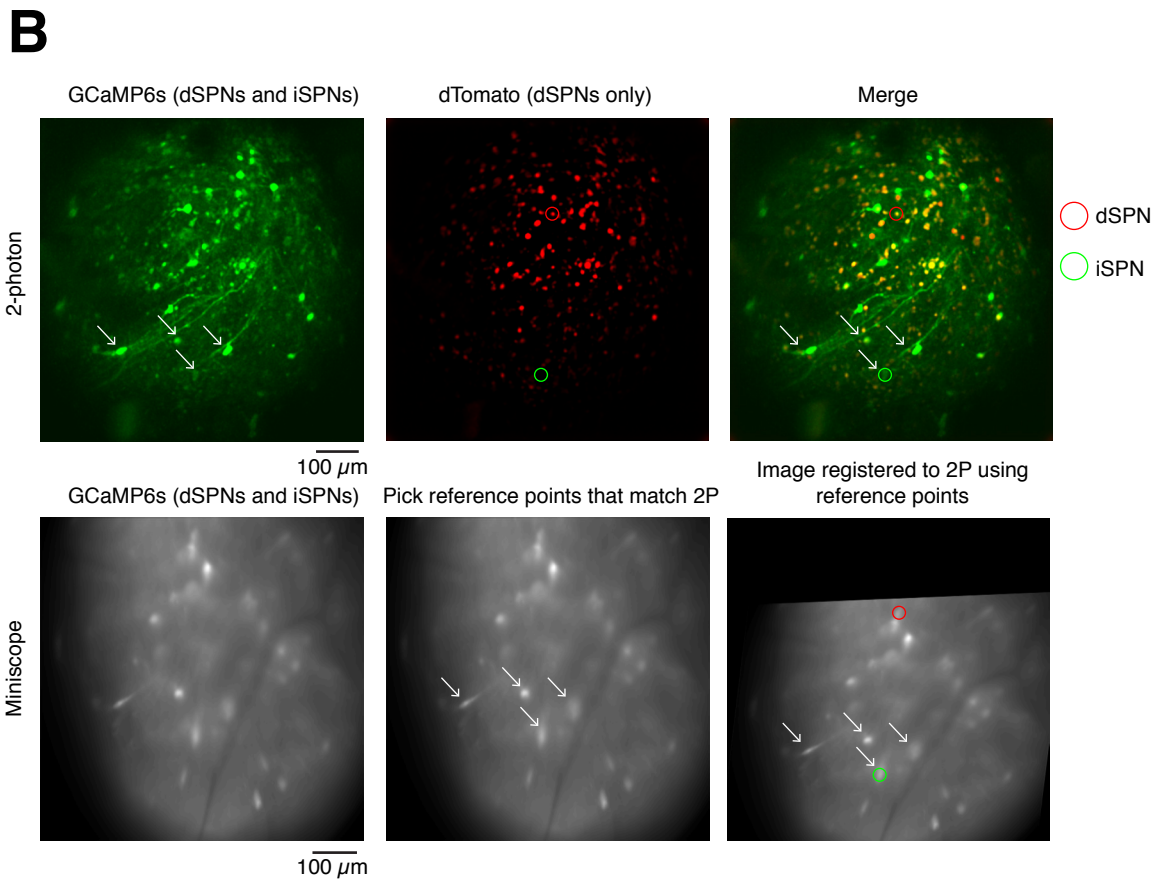

Supplement: NIHMS967127-supplement-9.pdf [file NIHMS967127-supplement-9.pdf]
